# Supplementary material for: CAR T-Cell Therapy: Is CD28-CAR Heterodimerization Its Achilles’ Heel?
Source: Front Immunol. 2021 Nov 17;12:766220. doi: 10.3389/fimmu.2021.766220 (PMC8635711; doi:10.3389/fimmu.2021.766220)
Supplement: Supplementary file 1 [file Table_1.xlsx]

## Sheet: Suppl Table
Study Name	1st Author	Year	Clinical Phase	Generic Name	CAR Design	Indication	Number of patients infused	Age	Dose	Neurological complication anygrade	Neurological complication grade 3	Neurological complication grade 4	Neurological complication grade 5
Tisagenlecleucel in Adult Relapsed or Refractory Diffuse Large B-Cell Lymphoma	Schuster	2019	2	Tisagenlecleucel (CTL-019)	FMC63-8-8-41BBz	NHL (DLBC)	111	56 (22–76)	5.8 x 106/kg (3.7-8.9)	23	8	5	0
Tisagenlecleucel in Children and Young Adults with B-Cell Lymphoblastic Leukemia	Maude	2018	2	Tisagenlecleucel (CTL-019)	FMC63-8-8-41BBz	Pediatric ALL	75	11 (3-23)	3.1 x 106/kg (0.2-5.4 )	30	10	0	0
Chimeric Antigen Receptor T Cells in Refractory B-Cell Lymphomas	Schuster	2017	1	Tisagenlecleucel (CTL-019)	FMC63-8-8-41BBz	NHL	28	59 (25-77)	1.79-5 × 106/kg	11	1	1	1
Chimeric antigen receptor T cells persist and induce sustained remissions in relapsed refractory chronic lymphocytic leukemia	Porter	2015	1	Tisagenlecleucel (CTL-019)	FMC63-8-8-41BBz	CLL	14	66 (51-78)	1.6 x 108 (0.14-11)	6	0	1	0
Long-term safety and activity of axicabtagene ciloleucel in refractory large B-cell lymphoma (ZUMA-1): a single-arm, multicentre, phase 1–2 trial	Locke	2019	2019-02-01	Axicabtagene ciloleucel (KTE-C19)	FMC63-28-28-28z	NHL	108	58 (34-69)	2 x 106/kg	72	32	3	0
End of phase I results of ZUMA-3, a phase 1/2 study of KTE-X19, anti-CD19 chimeric antigen receptor (CAR) T cell therapy, in adult patients (pts) with relapsed/refractory (R/R) acute lymphoblastic leukemia (ALL)	Shah	2019	2019-02-01	Axicabtagene ciloleucel (KTE-C19)	FMC63-28-28-28z	ALL	45	46 (18 – 77)	0-5-2 x 106/kg	NR	NR (grade3 ≥ 17)	NR (grade3 ≥ 17)	1
T cells expressing CD19 chimeric antigen receptors for acute lymphoblastic leukaemia in children and young adults: a phase 1 dose-escalation trial	Lee	2017	1	Axicabtagene ciloleucel (KTE-C19)	FMC63-28-28-28z	Pediatric ALL	21	13 (5-27)	0.03-3 x 106/kg	NR	1	0	0
Lymphoma Remissions Caused by Anti-CD19 Chimeric Antigen Receptor T Cells Are Associated With High Serum Interleukin-15 Levels	Kochenderfer	2017	1	Axicabtagene ciloleucel (KTE-C19)	FMC63-28-28-28z	NHL	22	53 (26-67)	2 x 106/kg (1-6)	NR	NR (grade3 ≥ 12)	NR (grade3 ≥ 12)	0
Pivotal Safety and Efficacy Results from Transcend NHL 001, a Multicenter Phase 1 Study of Lisocabtagene Maraleucel (liso-cel) in Relapsed/Refractory (R/R) Large B Cell Lymphomas	Abramson	2019	1	Lisocabtagene maraleucel (JCAR17)	FMC63-I4-28-41BBz-EGFRt	NHL	268	63 (18-86)	5 x 107 - 108	80	NR (grade3 ≥ 27)	NR (grade3 ≥ 27)	0
Intent-to-treat leukemia remission by CD19 CAR T cells of defined formulation and dose in children and young adults	Gardner	2017	1	Lisocabtagene maraleucel (JCAR17)	FMC63-I4-28-41BBz-EGFRt	Pediatric ALL	43	12.2 (1-25)	106/kg (0.05-10)	21	NR (grade3 ≥ 9)	NR (grade3 ≥ 9)	0
Immunotherapy of non-Hodgkin’s lymphoma with a defined ratio of CD8+ and CD4+ CD19-specific chimeric antigen receptor–modified T cells	Turtle	2016	1	Fred Hutchinson Cancer Center (JCAR14)	FMC63-I4-28-41BBz-EGFRt	NHL	32	58 (36-70)	2 x 106 /kg(0.2-20)	NR	NR (grade3 ≥ 9)	NR (grade3 ≥ 9)	1
CD19 CAR–T cells of defined CD4+:CD8+ composition in adult B cell ALL patients	Turtle	2016	1	Fred Hutchinson Cancer Center (JCAR14)	FMC63-I4-28-41BBz-EGFRt	ALL	30	40 (20-73)	2 x 106 /kg(0.2-20)	15	NR (grade3 ≥ 15)	NR (grade3 ≥ 15)	1
Durable molecular remissions in chronic lymphocytic leukemia treated with CD19-specific chimeric antigen receptor-modified T cells after failure of ibrutinib	Turtle	2017	1	Fred Hutchinson Cancer Center (JCAR14)	FMC63-I4-28-41BBz-EGFRt	CLL	24	61 (40-73)	2 x 106 /kg(0.2-20)	8	5	0	1
JCAR015 in ALL: A Root-Cause Investigation.	No authors listed	2018	2	JCAR15	SJ25C1-28-28-28z-EGFRt	ALL	32	≥ 18	106 /kg	NR	NR (grade3 ≥ 18)	NR (grade3 ≥ 18)	5
Long-Term Follow-up of CD19 CAR Therapy in Acute Lymphoblastic Leukemia	Park	2018	1	JCAR15	SJ25C1-28-28-28z-EGFRt	ALL	53	44 (23-74)	3 x 106 /kg(0.4-3)	33	19	3	0
A safe and potent anti-CD19 CAR T cell therapy	Ying	2019	1	CD19-BBz(86)	FMC63-8-8-41BBz-EGFRt	DLBCL, HGBL, FL	25	49 (24-76)	2-4 x 108	NR	0	0	0
Evidence of long‐lasting anti‐CD19 activity of engrafted CD19 chimeric antigen receptor–modified T cells in a phase I study targeting pediatrics with acute lymphoblastic leukemia	Ma	2019	1	Senl‐B19	SJ25C1-28-28-41BBz-EGFRt	Pediatric ALL	10	8 (3-13)	0.7 x 106 /kg(0.3-1.6)	3	2	1	0
Safety and feasibility of anti-CD19 CAR T cells with fully human binding domains in patients with B-cell lymphoma	Brudno	2020	1	Hu19	Hu19-8-8–28z	NHL	20	≥ 18	0.66-6 x 106 /kg	NR	0	1	0
Toxicity and response after CD19-specific CAR T-cell therapy in pediatric/young adult relapsed/refractory B-ALL	Curran	2019	1	JCAR15	SJ25C1-28-28-28z-EGFRt	Pediatric ALL	25	13 (1-22.5)	1-3 x 106 /kg	18	NR (grade3/4 ≥ 7)	NR (grade3/4 ≥ 7)	0
CD19 CAR T cells following autologous transplantation in poor-risk relapsed and refractory B-cell non-Hodgkin lymphoma	Sauter	2019	1	JCAR15	SJ25C1-28-28-28z-EGFRt	NHL	15	61 (34-75)	5 x 106 - 107	10	5	4	0
KTE-X19 CAR T-cell therapy in relapsed or refractory mantle-cell lymphoma	Wang	2020	2	Brexucabtagene autoleucel (KTE-X19)	FMC63-28-28-28z	MCL	68	65 (38-79)	2 x 106 /kg	43	15	6	0
Axicabtagene Ciloleucel CAR T-Cell Therapy in Refractory Large B-Cell Lymphoma*	Neelapu	2017	1	Axicabtagene ciloleucel (KTE-C19)	FMC63-28-28-28z	DLBCL, PMBCL, TFL	101	58 (23-76)	2 x 106 /kg	65	NR (grade3 ≥ 28)	NR (grade3 ≥ 28)	NR (grade3 ≥ 28)
Lisocabtagene maraleucel for patients with relapsed or refractory large B-cell lymphomas (TRANSCEND NHL 001): a multicentre seamless design study	Abramson	2020	1	Lisocabtagene maraleucel (JCAR17)	FMC63-I4-28-41BBz-EGFRt	DLBCL, FL	269	65 (54-70)	91 x 106 (44-156)	80	23	4	0
*Was not inculded in the analysis of Figure 1
